# Supplementary material
Source: MDPI journal article supplement (https://www.mdpi.com/2227-9040/10/12/523)
Supplement: s1 [file s1]

# Potentiometric Surfactant Sensor for Anionic Surfactants Based on 1,3-dioctadecyl-1*H*-imidazol-3-ium tetraphenylborate

Nikola Sakač <sup>1,\*</sup>, Dubravka Madunić-Čačić <sup>1,2</sup>, Dean Marković <sup>3</sup>, Lucija Hok <sup>4</sup>, Robert Vianello <sup>4</sup>, Valerije Vrček <sup>5</sup>, Bojan Šarkanj <sup>6</sup>, Bojan Đurin <sup>7</sup>, Bartolomeo Della Ventura <sup>8</sup>, Raffaele Velotta <sup>8</sup> and Marija Jozanović <sup>9,\*</sup>

<sup>1</sup> Faculty of Geotechnical Engineering, University of Zagreb, 42000 Varaždin, Croatia

<sup>2</sup> Saponia Chemical, Pharmaceutical and Foodstuff Industry, Inc., 31000 Osijek, Croatia

<sup>3</sup> Department of Biotechnology, University of Rijeka, 51000 Rijeka, Croatia

<sup>4</sup> Laboratory for the Computational Design and Synthesis of Functional Materials, Division of Organic Chemistry and Biochemistry, Ruđer Bošković Institute, 10 000 Zagreb, Croatia

<sup>5</sup> Department of Organic Chemistry, Faculty of Pharmacy and Biochemistry, University of Zagreb, A. Kovačića 1, 10000 Zagreb, Croatia

<sup>6</sup> Department of Food Technology, University North, 48000 Koprivnica, Croatia

<sup>7</sup> Department of Civil Engineering, University North, 42000 Varaždin, Croatia

<sup>8</sup> Department of Physics “E. Pancini” – Università Di Napoli Federico II, 80126, Napoli, Italy

<sup>9</sup> Department of Chemistry, University of Osijek, HR-31000 Osijek, Croatia

\*Correspondence: mjozanovic@kemija.unios.hr; Tel.: +385996865716 (M.J.); nikola.sakac@gfv.unizg.hr; Tel.: +385915830336 (N.S.)

## Table of contents:

**Figure S1.** <sup>1</sup>H NMR (400 MHz; CDCl<sub>3</sub>) of 1,3-dioctadecyl-1*H*-imidazol-3-ium tetraphenylborate (2).

**Figure S2.** <sup>13</sup>C NMR (100.613 MHz; CDCl<sub>3</sub>) of 1,3-dioctadecyl-1*H*-imidazol-3-ium tetraphenylborate (2).

**Figure S3.** ATR-FTIR spectra of powder 1,3-dioctadecyl-1*H*-imidazol-3-ium tetraphenylborate (2).

**Figure S4.** RMSD graphs during the molecular dynamics simulation in the aqueous solution.

**Figure S5.** Time dependence of the distance between the boron atom in TPB<sup>-</sup> and the nitrogen atoms in DODI<sup>+</sup> during the molecular dynamics simulation.

**Figure S6.** Charge distribution within the DODI<sup>+</sup> cation and the TPB<sup>-</sup> anion.

**1,3-dioctadecyl-1*H*-imidazol-3-ium tetraphenylborate (2).**

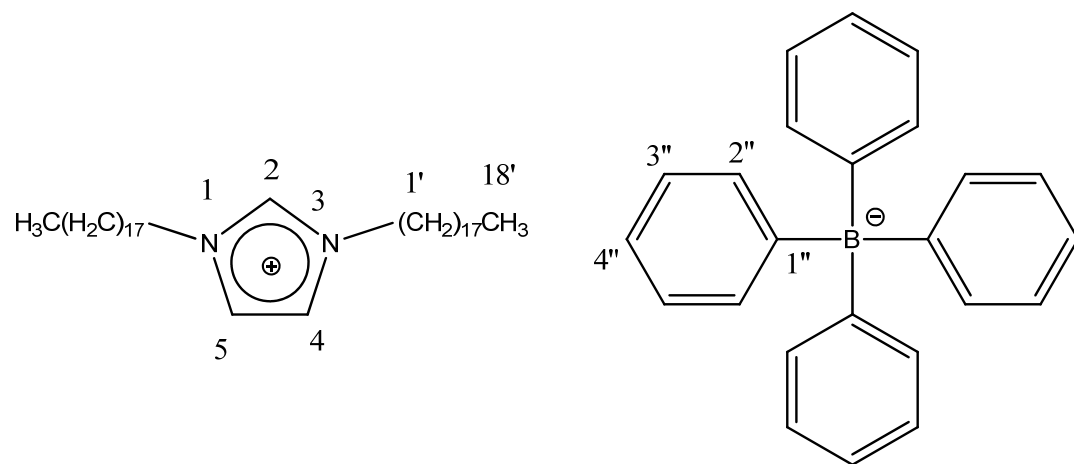

Formula: C<sub>63</sub>H<sub>97</sub>BN<sub>2</sub>, Mr = 893.27 g/mol, (mass of QAC<sup>+</sup> 574), Yield = 92.58%, White powder, m.p. = 81.4-83.9 °C, Elem. Anal. (calc.): C, 84.71; H, 10.95; B, 1.21; N, 3.14, Elem. Anal. (exp.): C, 82.29; H, 11.04; B N/A; N, 3.26.

<sup>1</sup>H NMR (400 MHz; CDCl<sub>3</sub>): δ 7.57-7.46 (8H, m, H-C(1'')), 7.00 (8H, t, J=7.4 Hz, H-C(2'')), 6.83 (8H, t, J=7.4 Hz, H-C(3'')), 6.24 (2H, brs, H-C(4), H-C(5)), 4.95 (1H, brs, H-C(2)), 3.21 (4H, t, J=7.4 Hz, H-C(1')); 1.39 (4H, quint, J=7.4 Hz, H-C(2'')); 1.33-1.17 (56H, m, H-C(3')-H C(16')), 1.10 (4H, tq, J= 7.4, Hz, J=7.0 Hz, H-C(17')), 0.88 (6H, t, J=7.0 Hz, H-C(18'));

<sup>13</sup>C NMR (100.613 MHz; CDCl<sub>3</sub>): δ 164.0 (4C atoms, q, J= 49.0 Hz, C(1'')), 135.9, 134.9, 125.9, 121.9, 120.7, 49.4, 31.9, 29.8, 29.7 (8C atoms), 29.64 (4C atoms), 29.60, 29.4, 29.3 (4C atoms), 28.9, 26.1, 22.7, 14.1.

IR (KBr,  $\text{cm}^{-1}$ ): 3450, 3100, 2900, 2850, 2050, 100, 1550, 1450, 1150

MS-CI ( $\text{NH}_3$ ): 573, 491, 455, 395, 304, 219, 163, 122, 86.

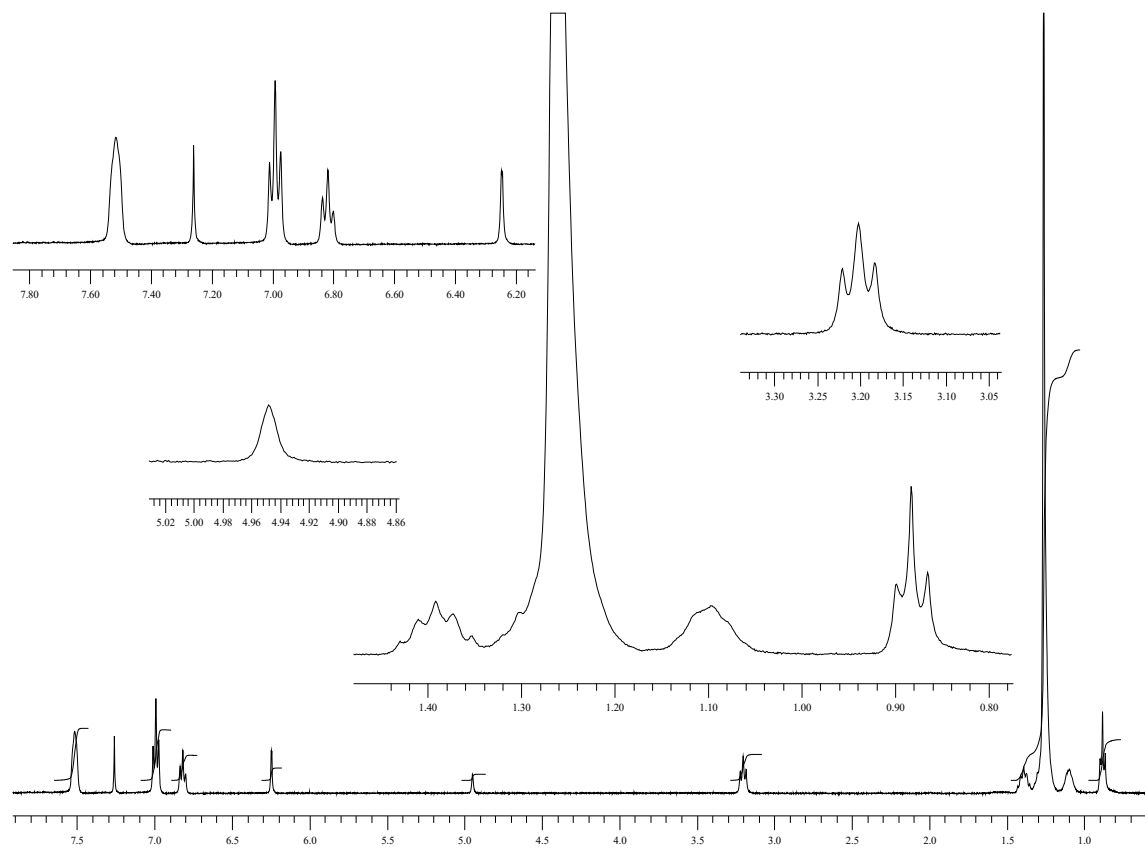

**Figure S1.**  $^1\text{H}$  NMR (400 MHz;  $\text{CDCl}_3$ ) of 1,3-dioctadecyl-1H-imidazol-3-ium tetraphenylborate (2).



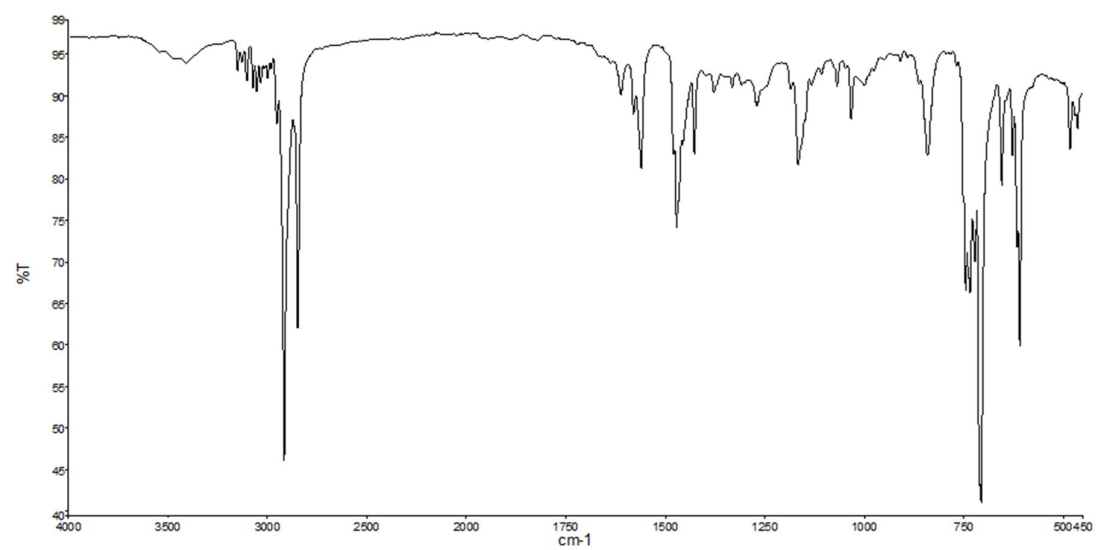

**Figure S3.** ATR-FTIR spectra of powder 1,3-diocetadecyl-1H-imidazol-3-ium tetraphenylborate (2).

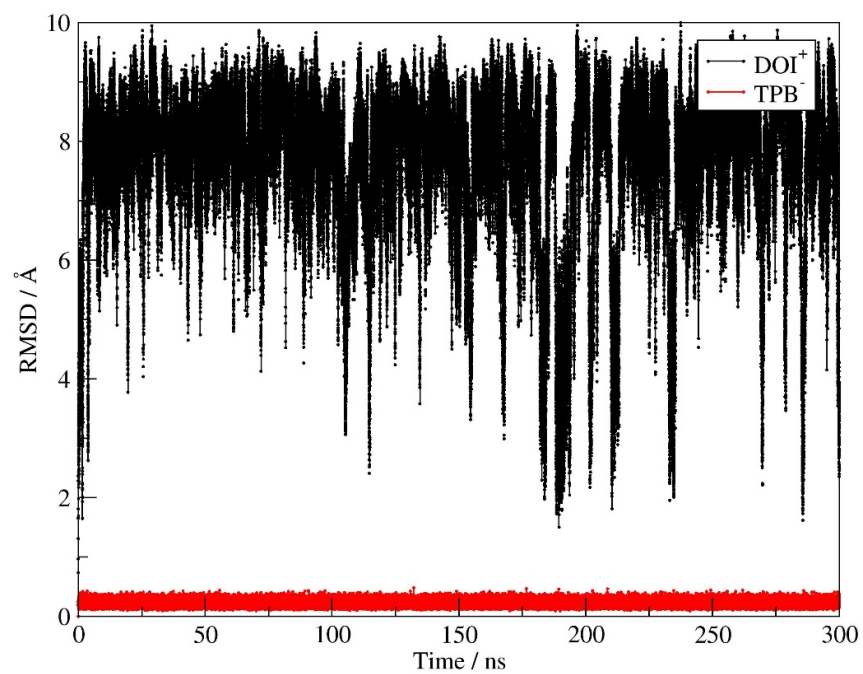

**Figure S4.** RMSD graphs during the molecular dynamics simulation of the DODI<sup>+</sup> cation (in black) and the TPB<sup>-</sup> anion (in red) in the aqueous solution, revealing a much higher flexibility of the former.

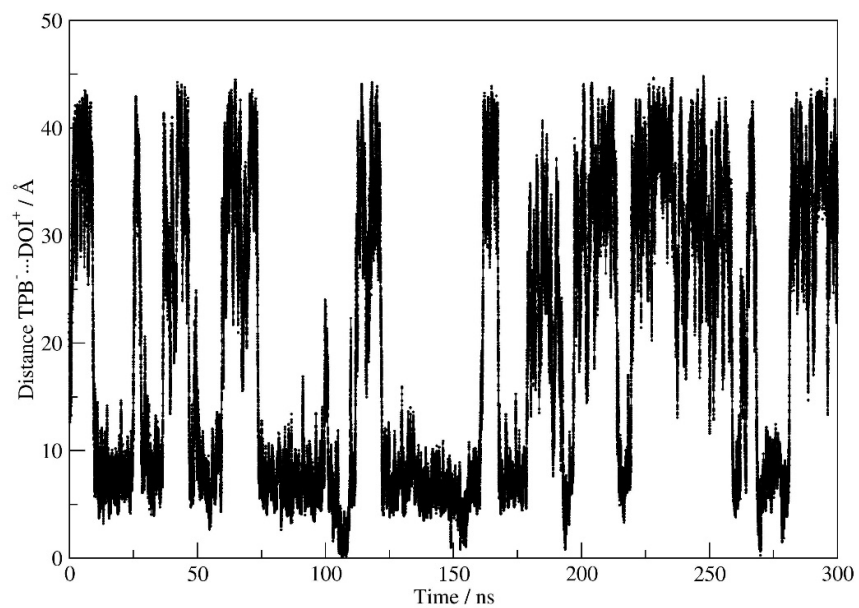

**Figure S5.** Time dependence of the distance between the boron atom in TPB<sup>-</sup> and the nitrogen atoms in DODI<sup>+</sup> during the molecular dynamics simulation, indicating that the DODI–TPB complex formation is reversible and in the equilibrium with dissociated components.

### ISOLATED COMPONENTS BEFORE THE COMPLEX FORMATION

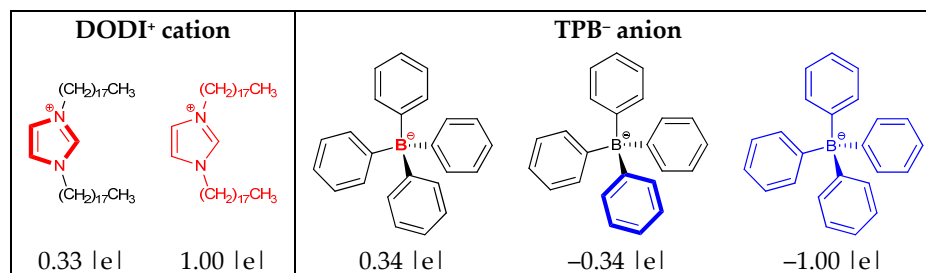

### COMPONENTS WITHIN THE DODI-TPB COMPLEX

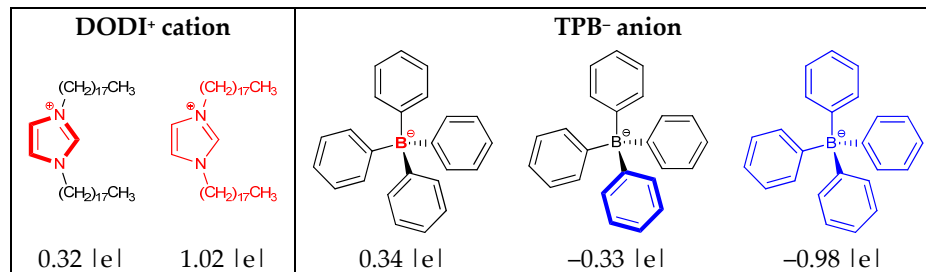

**Figure S6.** Charge distribution within the DODI<sup>+</sup> cation and the TPB<sup>-</sup> anion, either isolated or within the elucidated representative structure of the DODI-TPB complex, as obtained by the NBO analysis at the (SMD)/M06-2X/6-31+G(d) level of theory in water. Particular set of atoms considered for the analysis is denoted with a color and includes the attached hydrogen atoms as well. The results reveal that only 2% of the charge density is transferred among components following the DODI-TPB complex formation.
